# Supplementary material for: HighResClimNevada: a high-resolution climatological dataset for a high-altitude region in Southern Spain (Sierra Nevada)
Source: Copernicus journal article supplement (doi:10.5194/essd-2024-522), 2024-12-13
Supplement: Supplementary file 1 [file essd-2024-522-supplement.pdf]

# HighResClimNevada: a High-resolution Climatological Dataset for a High-altitude Region in Southern Spain (Sierra Nevada)

Matilde García-Valdecasas Ojeda<sup>1,2,\*</sup>, Feliciano Solano-Farías<sup>1</sup>, David Donaire-Montaño<sup>1</sup>, Emilio Romero-Jiménez<sup>1</sup>, Juan José Rosa-Cánovas<sup>1,2</sup>, Yolanda Castro-Díez<sup>1,2</sup>, Sonia Raquel Gámiz-Fortís<sup>1,2</sup>, and María Jesús Esteban-Parra<sup>1,2</sup>

<sup>1</sup>Departamento de Física Aplicada, Universidad de Granada, Granada, Spain.

<sup>2</sup>Instituto Interuniversitario de Investigación del Sistema Tierra en Andalucía (IISTA-CEAMA), Granada, Spain

\*correspondence to: [mvaldecasas@ugr.es](mailto:mvaldecasas@ugr.es)

## Supplementary figures

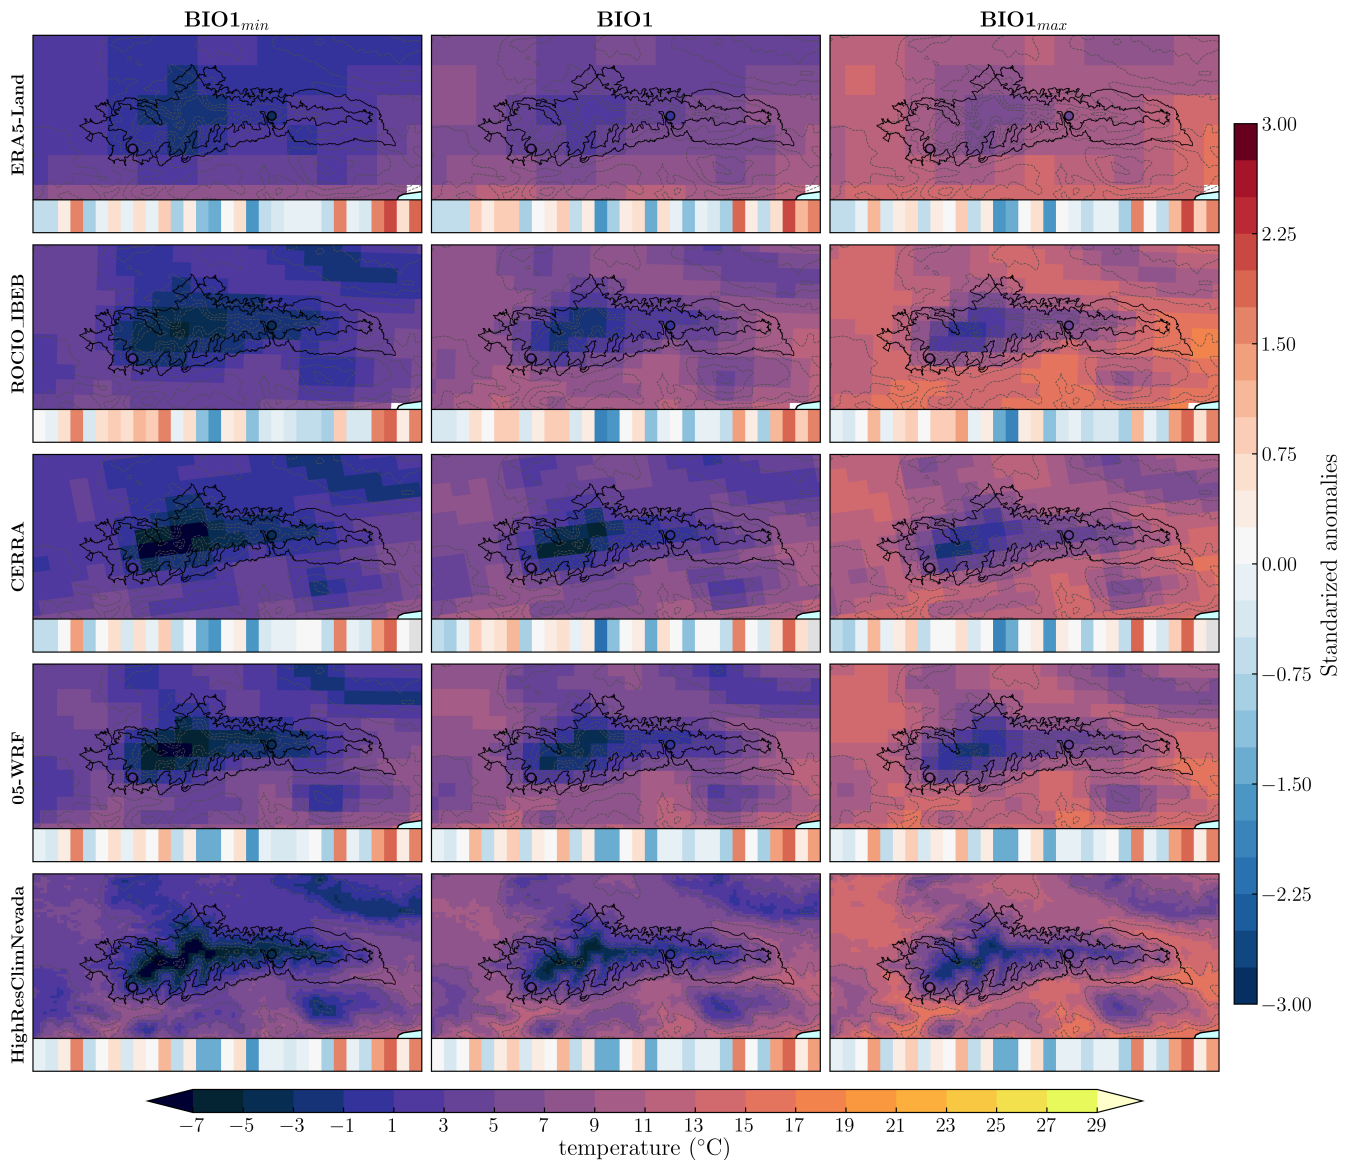

**Fig. S1** Winter (DJF) average of daily maximum (tasmax), mean (tasmean), and minimum (tasmin) temperatures (°C). Below each panel, the annual temperature in Sierra Nevada is shown through *warming stripes* related to 2001-2020.

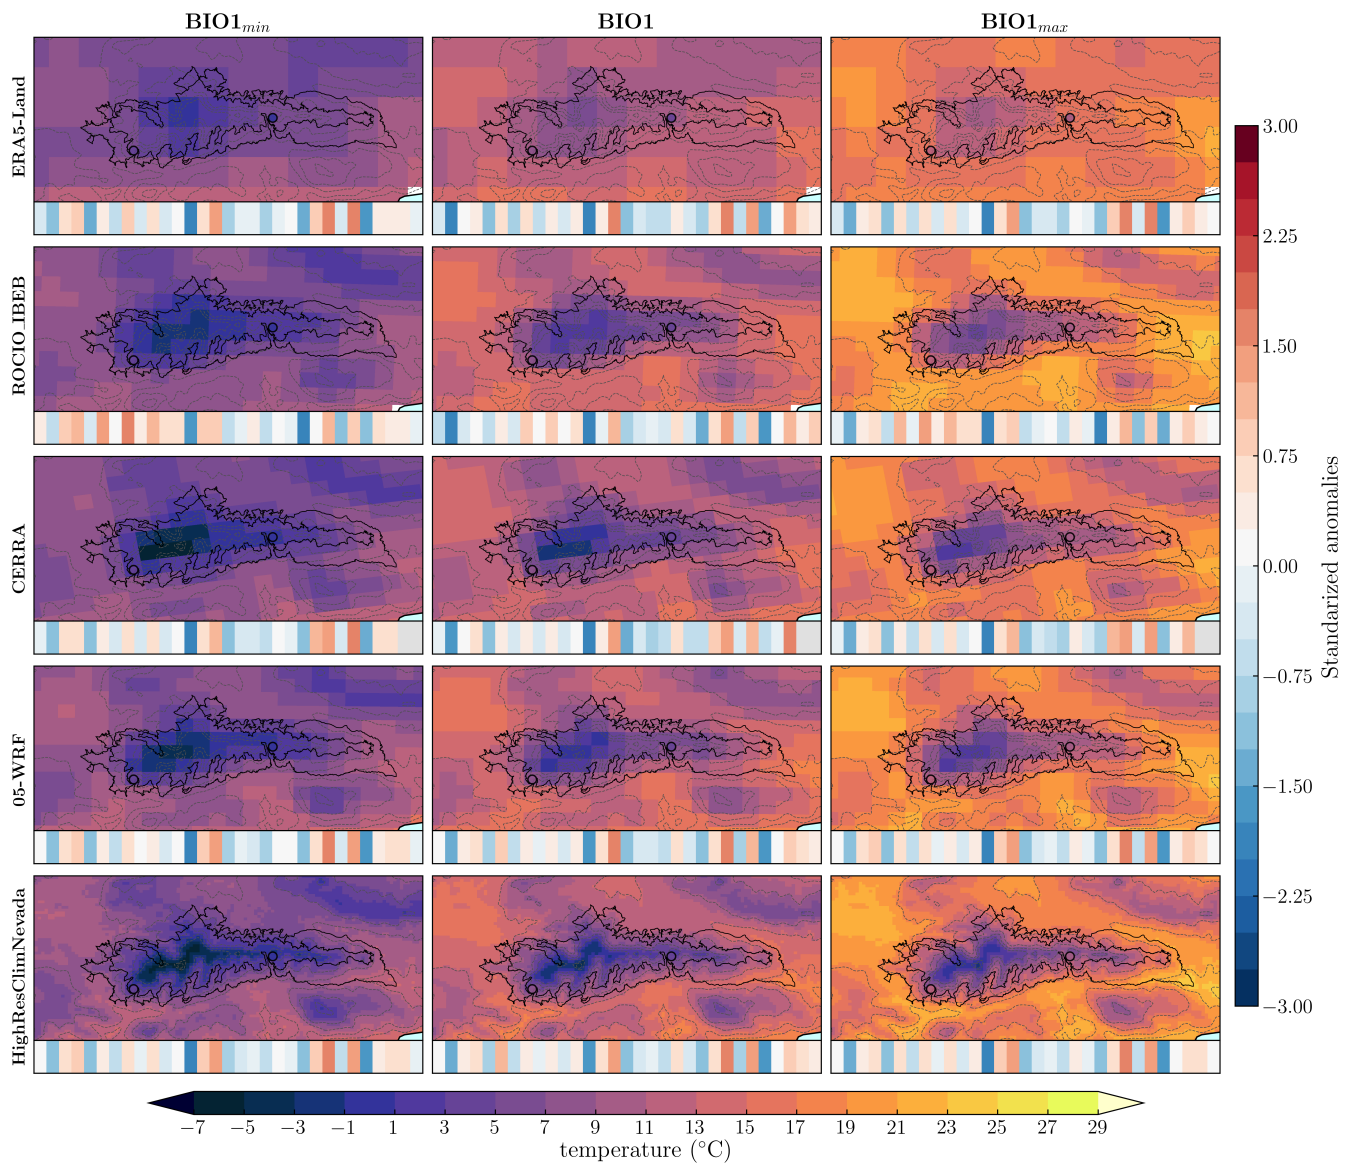

**Fig. S2** Spring (MAM) average of daily maximum (tasmax), mean (tasmean), and minimum (tasmin) temperatures (°C). Below each panel, the annual temperature in Sierra Nevada is shown through *warming stripes* related to 2001-2020.

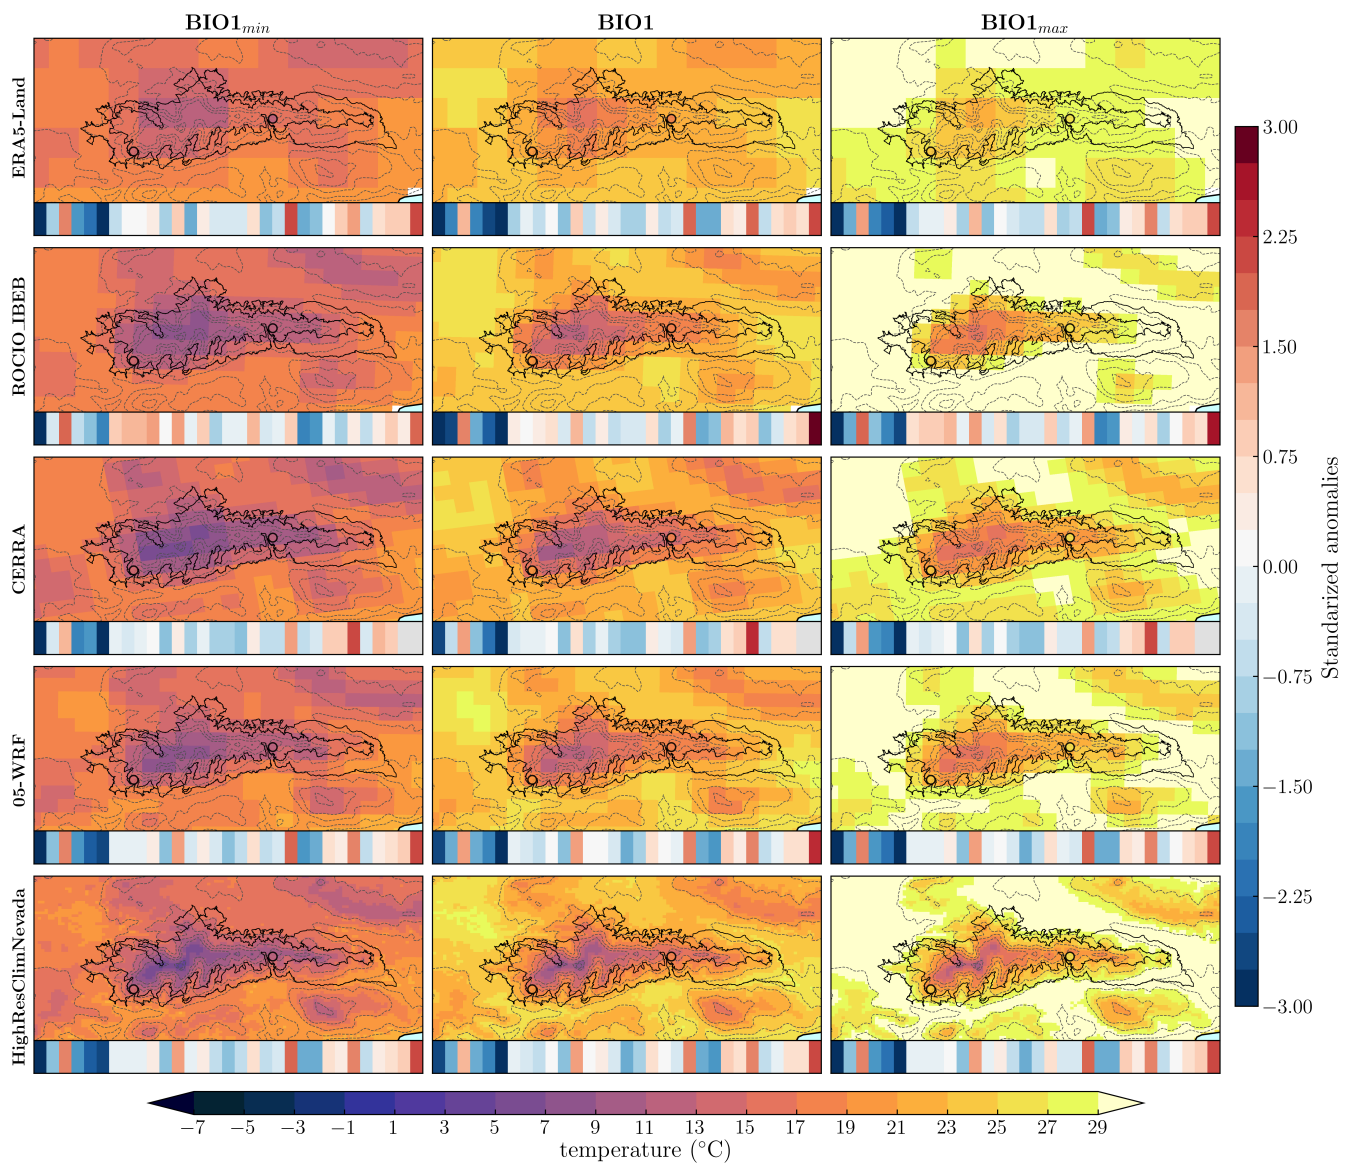

**Fig. S3** Summer (JJA) average of daily maximum (tasmax), mean (tasmean), and minimum (tasmin) temperatures ( $^{\circ}C$ ). Below each panel, the annual temperature in Sierra Nevada is shown through *warming stripes* related to 2001-2020.

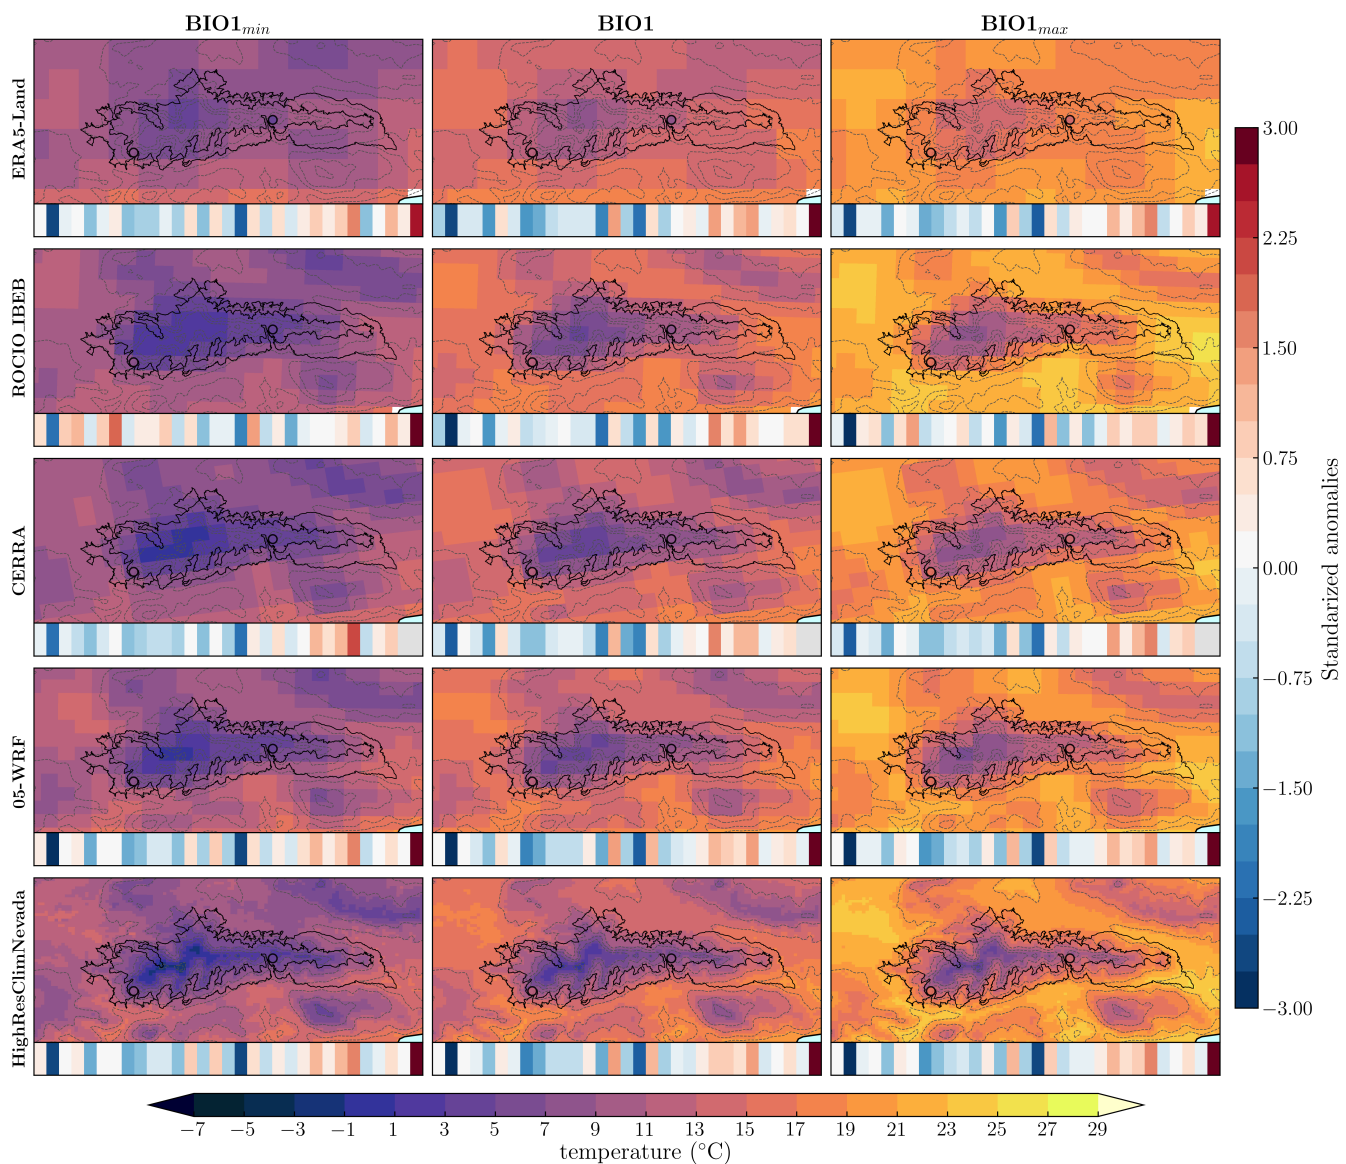

**Fig. S4** Autumn (SON) average of daily maximum (tasmax), mean (tasmean), and minimum (tasmin) temperatures (°C). Below each panel, the annual temperature in Sierra Nevada is shown through *warming stripes* related to 2001-2020.

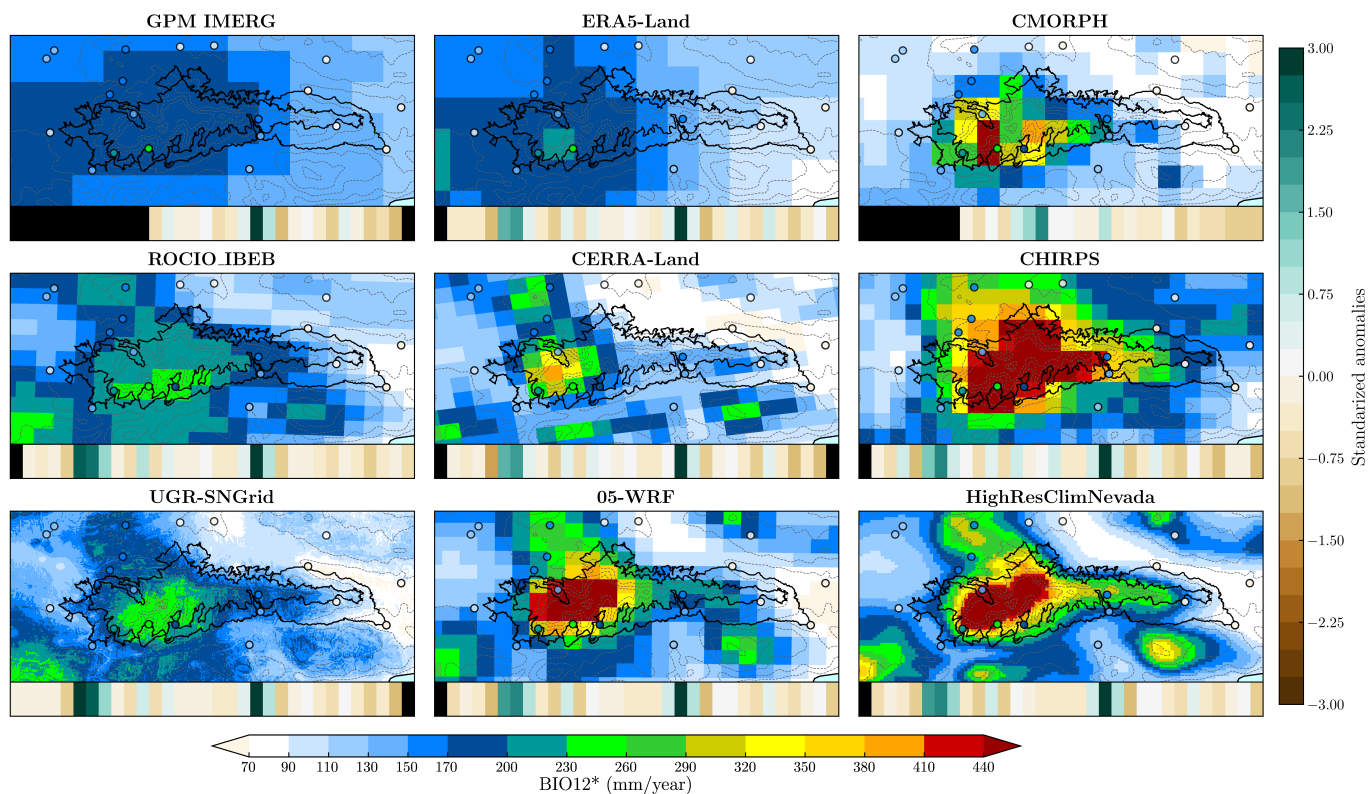

**Fig. S5** Winter (DJF) amount of precipitation (mm) in Sierra Nevada. Below each panel, the annual precipitation in Sierra Nevada is shown through *drying stripes* related to 2001-2020.

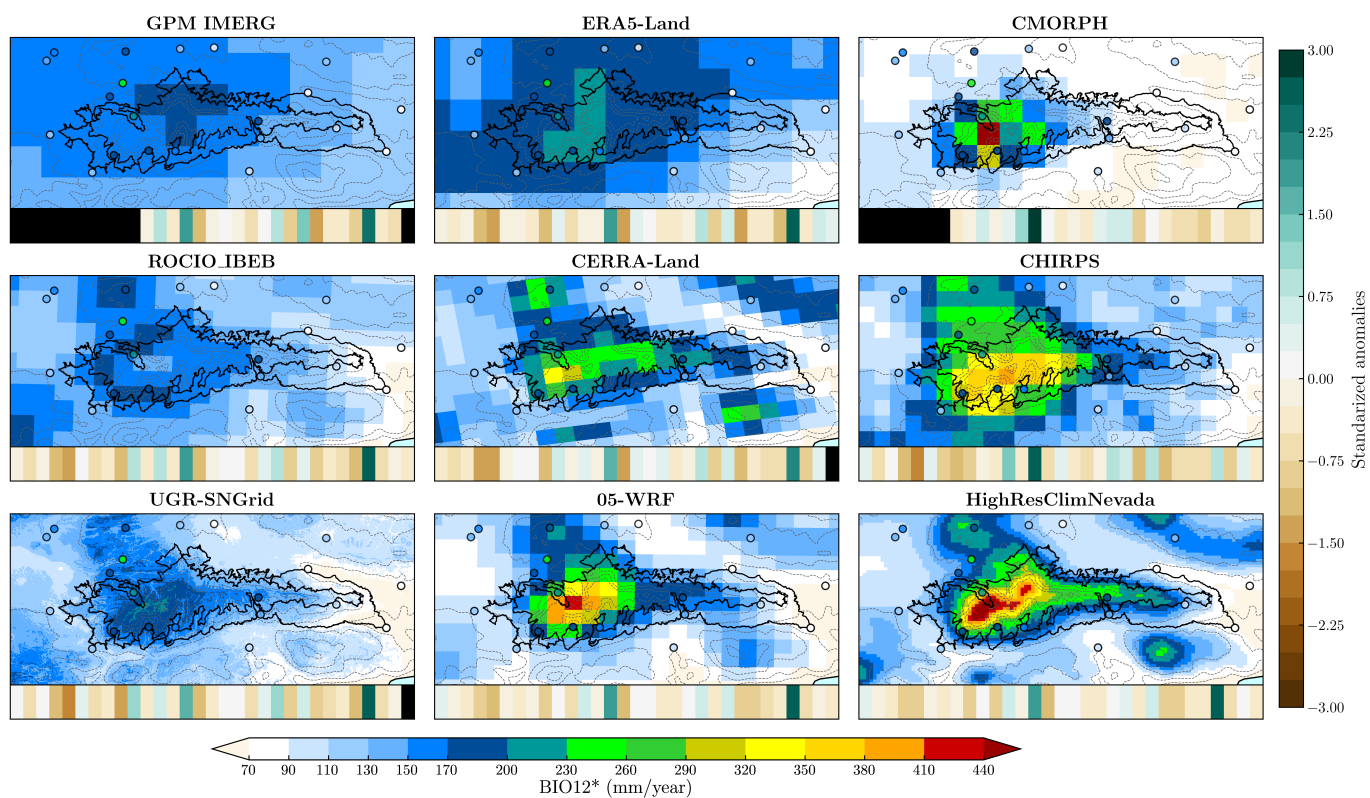

**Fig. S6** Spring (MAM) amount of precipitation (mm) in Sierra Nevada. Below each panel, the annual precipitation in Sierra Nevada is shown through *drying stripes* related to 2001-2020.

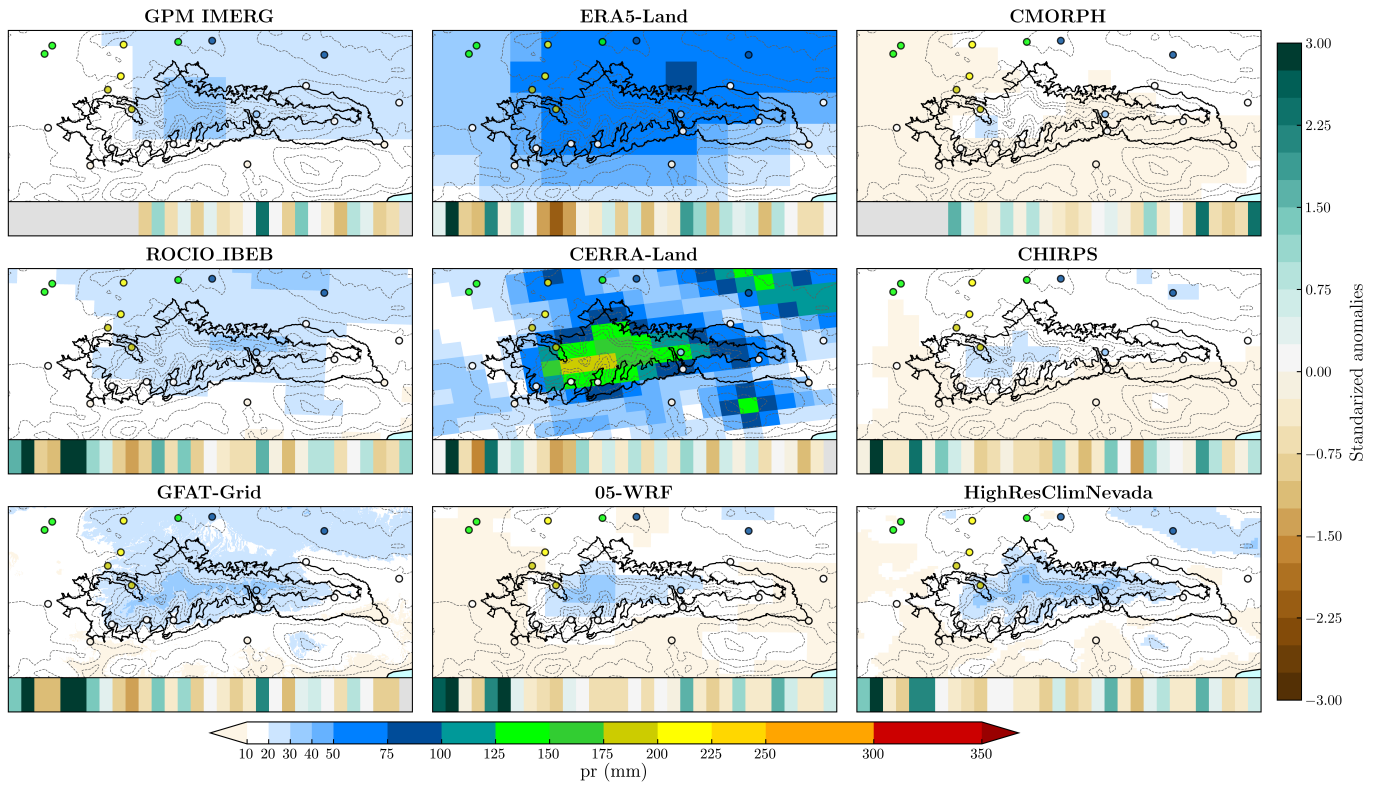

**Fig. S7** Summer (JJA) amount of precipitation (mm) in Sierra Nevada. Below each panel, the annual precipitation in Sierra Nevada is shown through *drying stripes* related to 2001-2020.

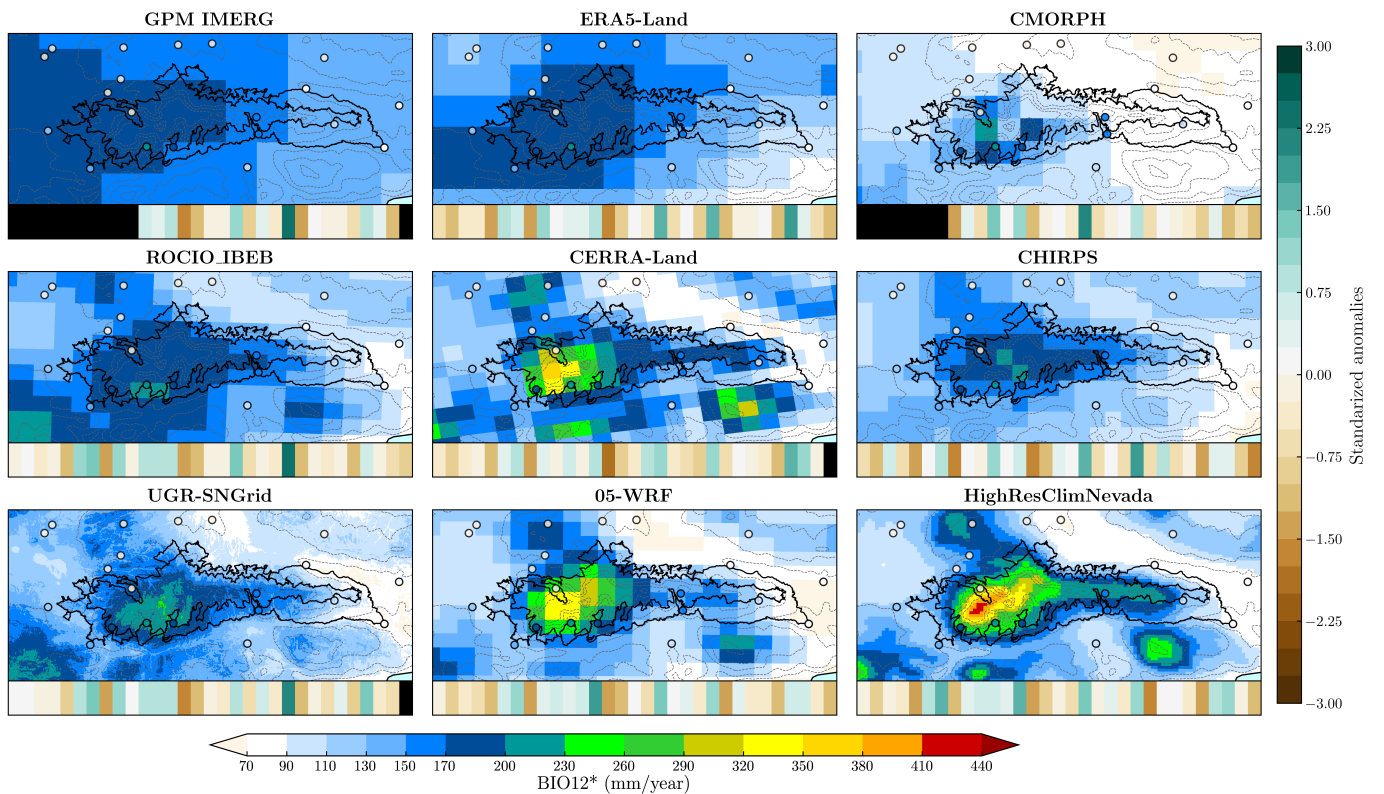

**Fig. S8** Autumn (SON) amount of precipitation (mm) in Sierra Nevada. Below each panel, the annual precipitation in Sierra Nevada is shown through *drying stripes* related to 2001-2020.

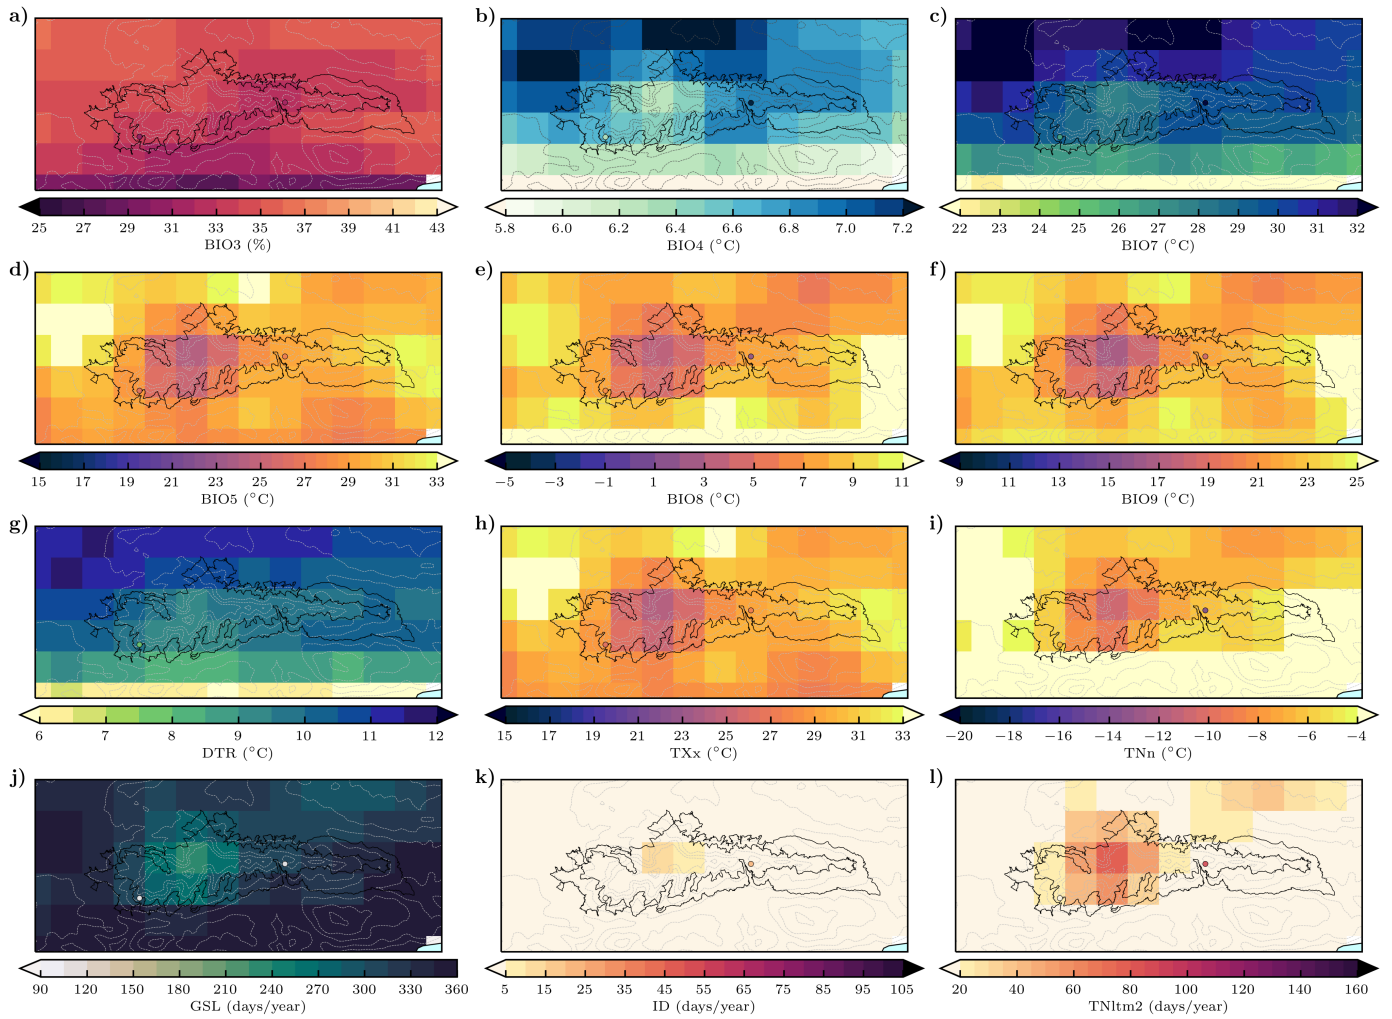

**Fig. S9** ERA5-Land temperature bioclimatic variables and extremes: (a) isothermality (BIO3, %), (b) temperature seasonality (BIO4, °C), (c) annual temperature range (BIO7, °C), (d) daily temperature range (DTR, °C), (e) maximum TX (TXx, °C), (f) minimum TN (TNn, °C), (g) growing season length (GSL, days/year), (h) frost days\* (FD, TNltm2), and (j) icing days (ID, days/year).

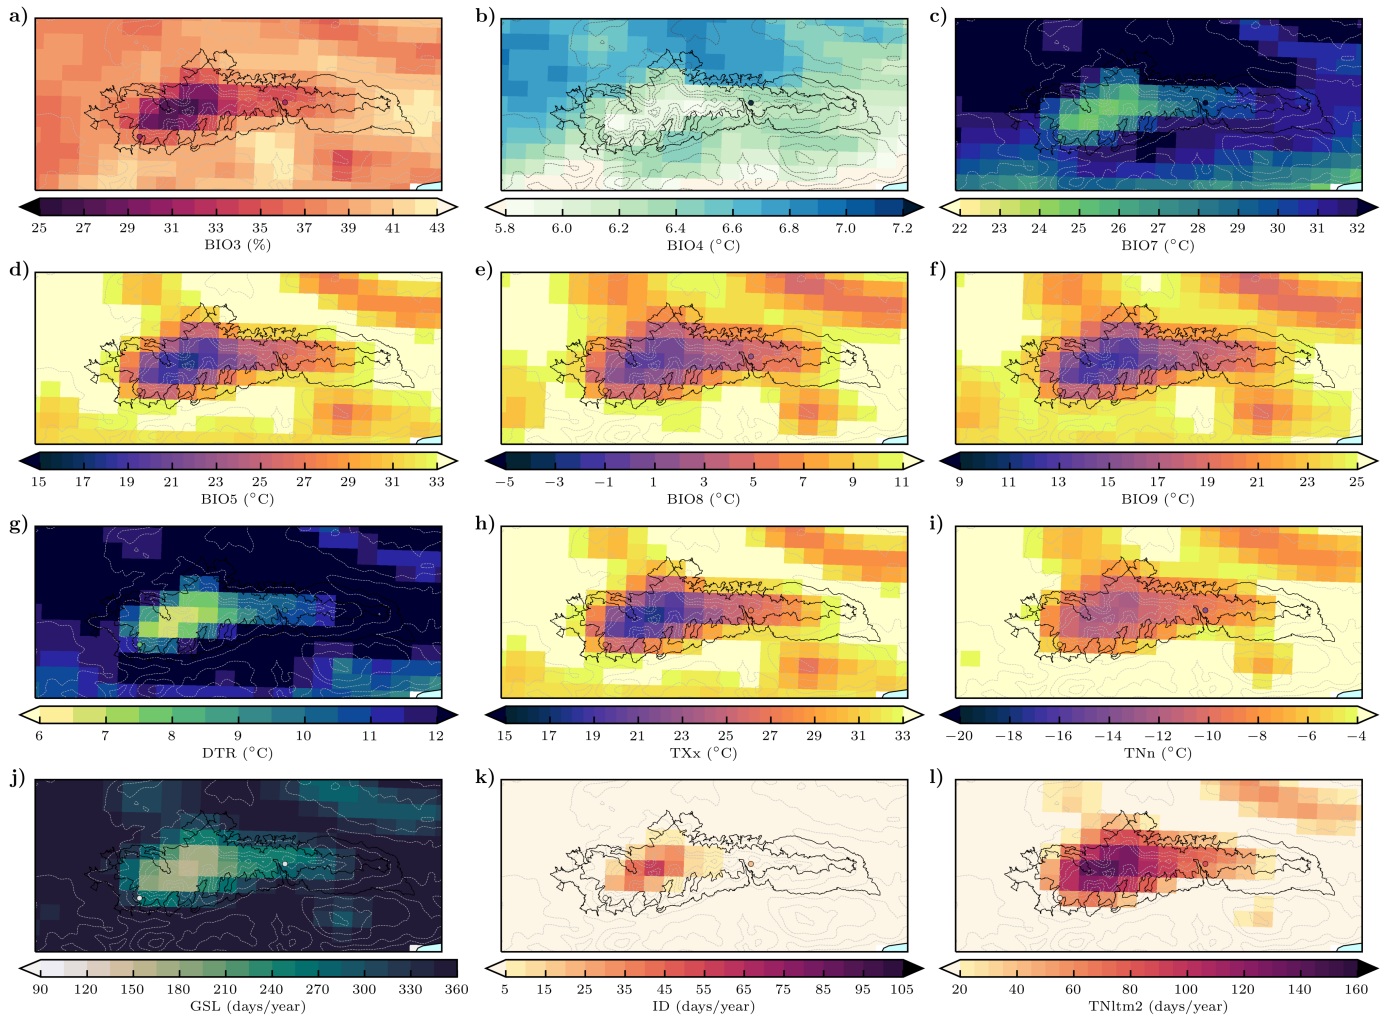

**Fig. S10** ROCIO\_IBEB temperature bioclimatic variables and extremes: (a) isothermality (BIO3, %), (b) temperature seasonality (BIO4, °C), (c) annual temperature range (BIO7, °C), (d) daily temperature range (DTR, °C), (e) maximum TX (TXx, °C), (f) minimum TN (TNn, °C), (g) growing season length (GSL, days/year), (h) frost days\* (FD, TNltm2), and (j) icing days (ID, days/year).



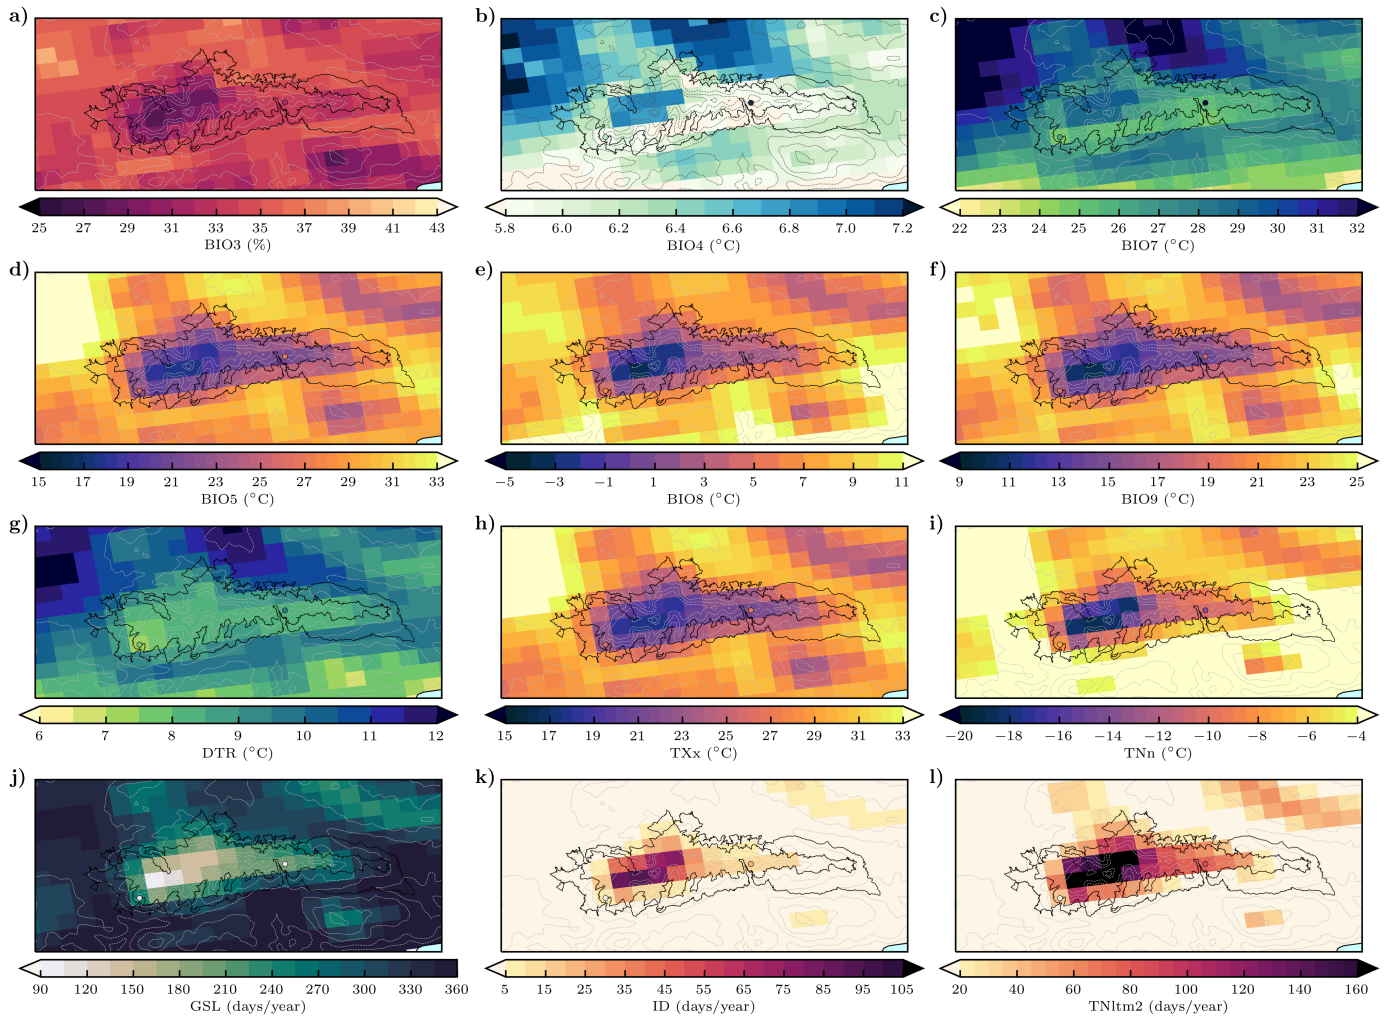

**Fig. S11** CERRA temperature bioclimatic variables and extremes: (a) isothermality (BIO3, %), (b) temperature seasonality (BIO4, °C), (c) annual temperature range (BIO7, °C), (d) daily temperature range (DTR, °C), (e) maximum TX (TXx, °C), (f) minimum TN (TNn, °C), (g) growing season length (GSL, days/year), (h) frost days\* (FD, TNltm2), and (j) icing days (ID, days/year).

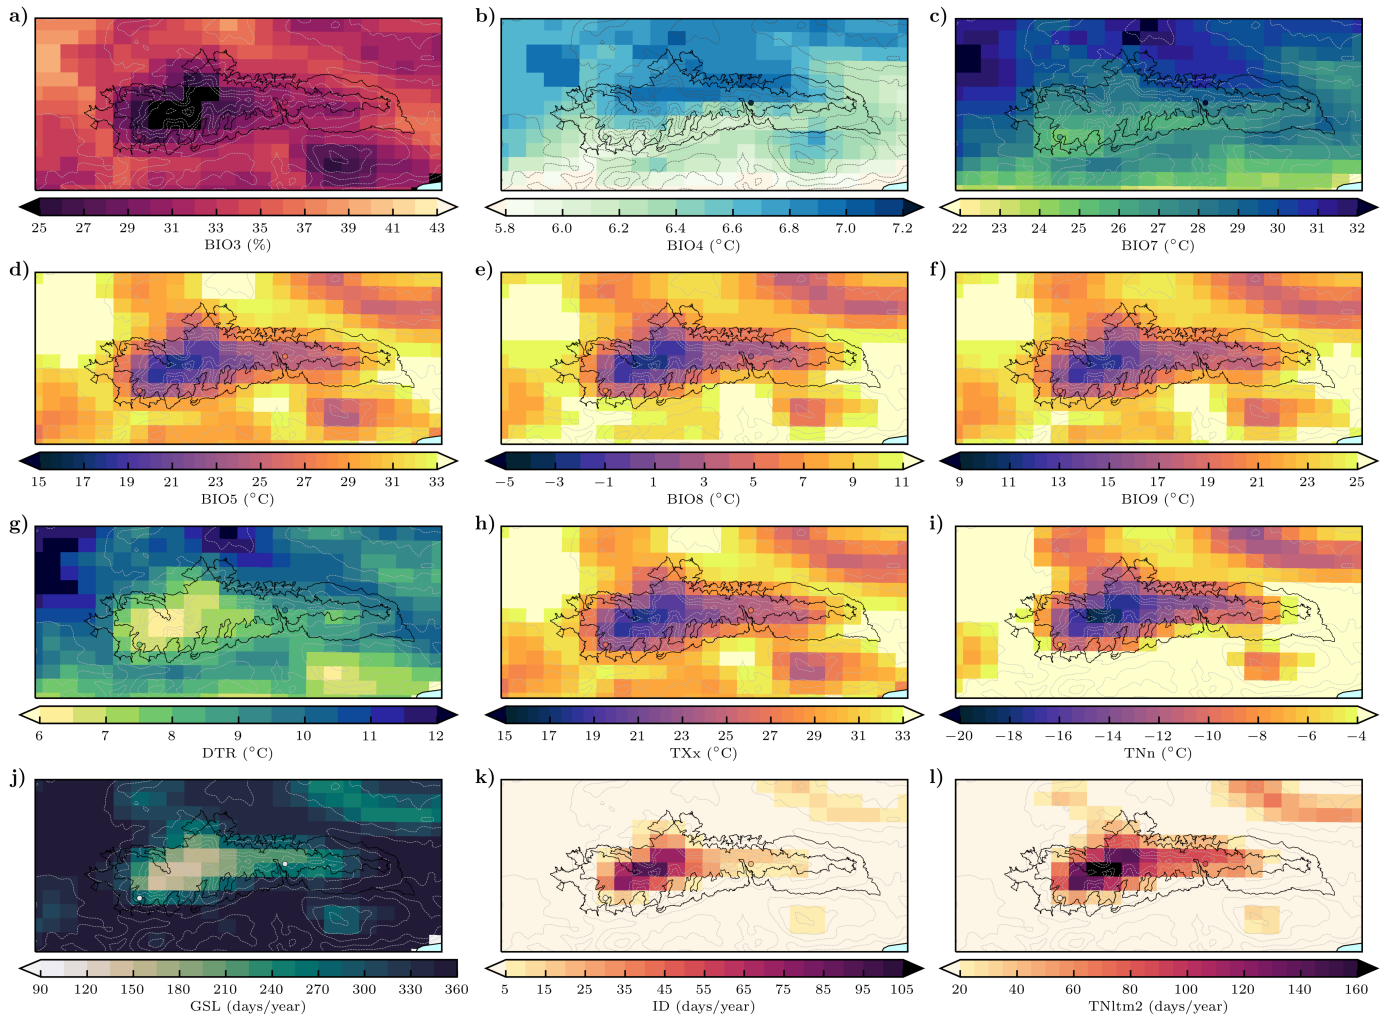

**Fig. S12** 05-WRF temperature bioclimatic variables and extremes: (a) isothermality (BIO3, %), (b) temperature seasonality (BIO4, °C), (c) annual temperature range (BIO7, °C), (d) daily temperature range (DTR, °C), (e) maximum TX (TXx, °C), (f) minimum TN (TNn, °C), (g) growing season length (GSL, days/year), (h) frost days\* (FD, TNltm2), and (j) icing days (ID, days/year).

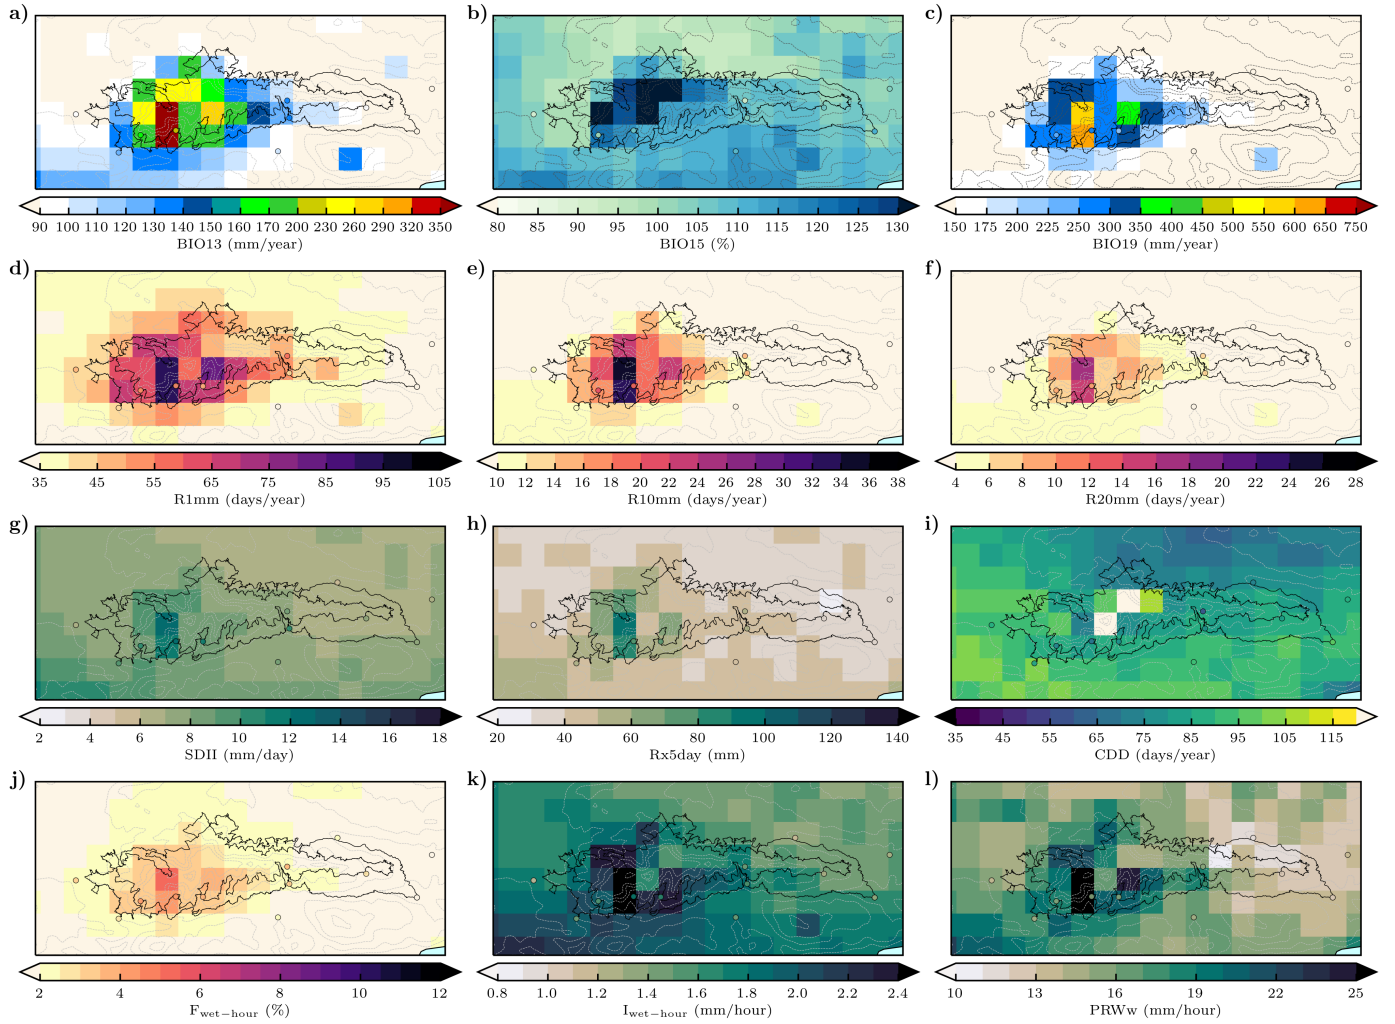

**Fig. S13** GPM IMERG precipitation bioclimatic variables and extremes: (a) precipitation of wettest month (BIO13, mm/month), (b) precipitation seasonality (BIO15, mm/month), (c) precipitation in the coldest quarter (BIO19, mm/month), (d) wet days (R1mm, days/year), (e) heavy precipitation days (R10mm, days/year), (f) very heavy precipitation days (R20mm, days/year), (g) simple daily intensity index (SDII, mm/year), (h) maximum 5-day precipitation (Rx5day, mm), (i) consecutive dry days (CDD, days/year), (j) wet-hour frequency (F<sub>wet-hour</sub>, %), (k) wet-hour intensity (I<sub>wet-hour</sub>, mm/hour), and (l) maximum amount in the wettest month (PRWw, mm/hour).

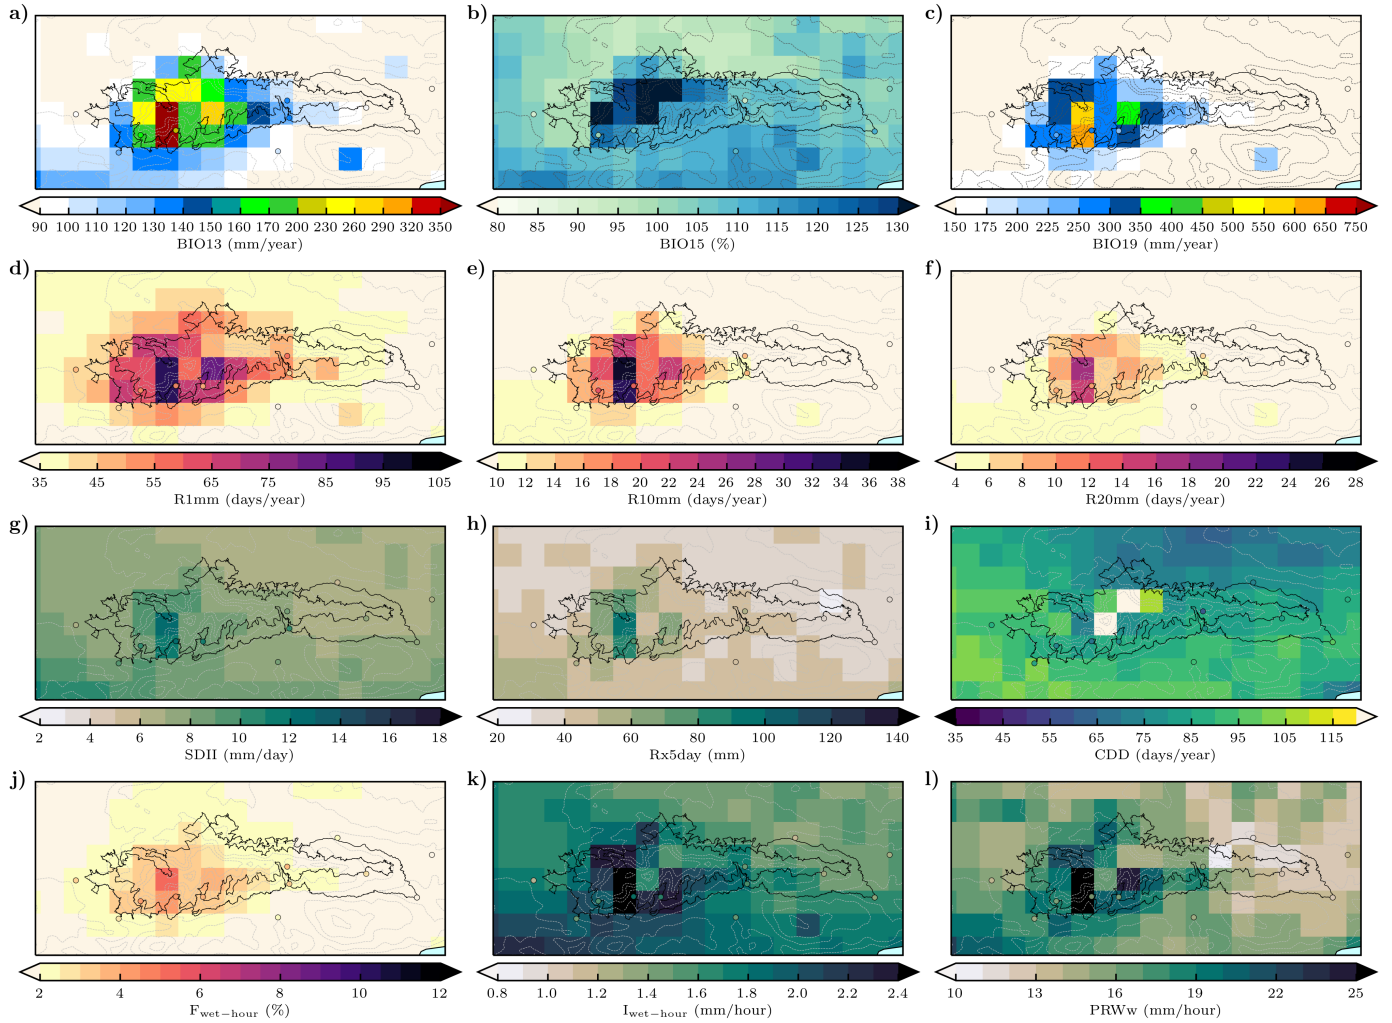

**Fig. S14** ERA5-Land precipitation bioclimatic variables and extremes: (a) precipitation of wettest month (BIO13, mm/month), (b) precipitation seasonality (BIO15, mm/month), (c) precipitation in the coldest quarter (BIO19, mm/month), (d) wet days (R1mm, days/year), (e) heavy precipitation days (R10mm, days/year), (f) very heavy precipitation days (R20mm, days/year), (g) simple daily intensity index (SDII, mm/year), (h) maximum 5-day precipitation (Rx5day, mm), (i) consecutive dry days (CDD, days/year), (j) wet-hour frequency ( $F_{\text{wet-hour}}$ , %), (k) wet-hour intensity ( $I_{\text{wet-hour}}$ , mm/hour), and (l) maximum amount in the wettest month (PRWw, mm/hour).



**Fig. S15** CMORPH precipitation bioclimatic variables and extremes: (a) precipitation of wettest month (BIO13, mm/month), (b) precipitation seasonality (BIO15, mm/month), (c) precipitation in the coldest quarter (BIO19, mm/month), (d) wet days (R1mm, days/year), (e) heavy precipitation days (R10mm, days/year), (f) very heavy precipitation days (R20mm, days/year), (g) simple daily intensity index (SDII, mm/day), (h) maximum 5-day precipitation (Rx5day, mm), (i) consecutive dry days (CDD, days/year), (j) wet-hour frequency ( $F_{\text{wet-hour}}$ , %), (k) wet-hour intensity ( $I_{\text{wet-hour}}$ , mm/hour), and (l) maximum amount in the wettest month (PRWw, mm/hour).

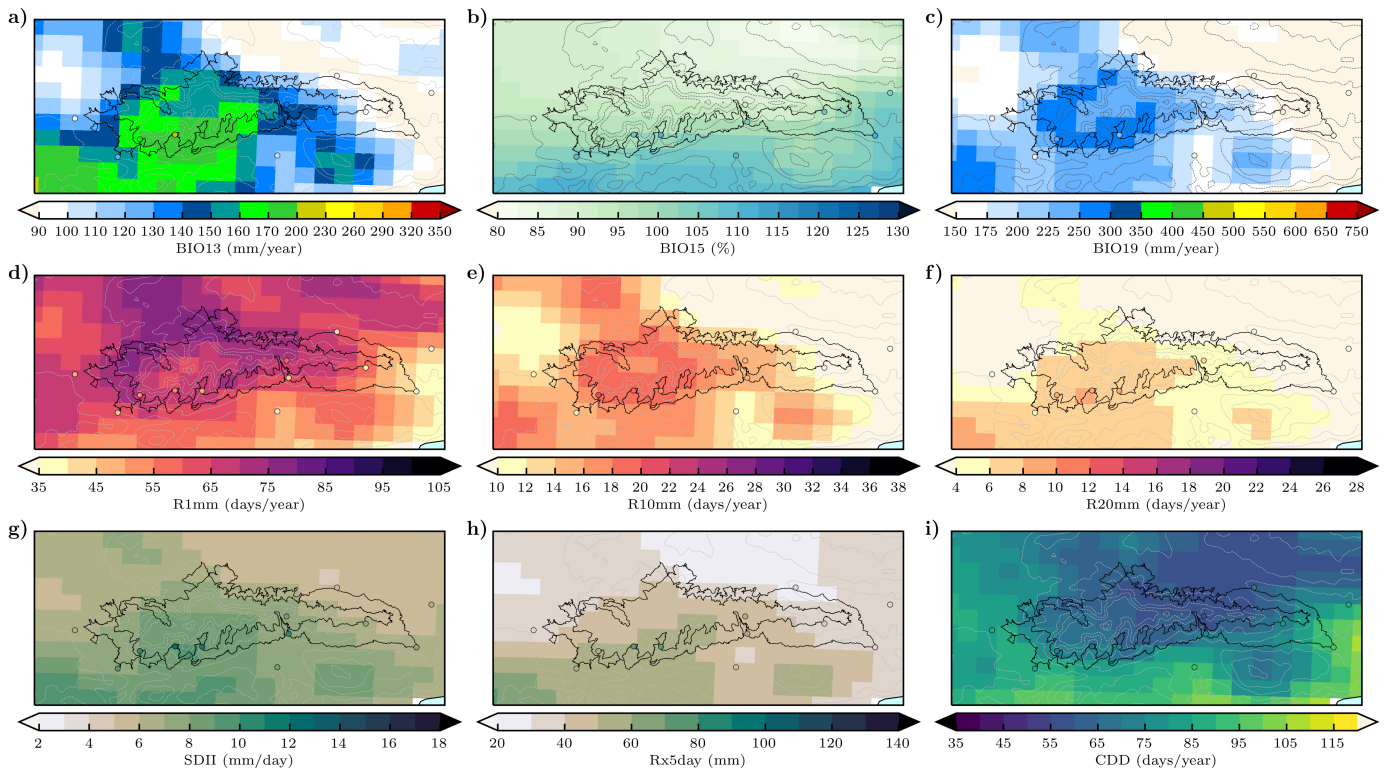

**Fig. S16** ROCIO\_IBEB precipitation bioclimatic variables and extremes: (a) precipitation of wettest month (BIO13, mm/month), (b) precipitation seasonality (BIO15, mm/month), (c) precipitation in the coldest quarter (BIO19, mm/month), (d) wet days (R1mm, days/year), (e) heavy precipitation days (R10mm, days/year), (f) very heavy precipitation days (R20mm, days/year), (g) simple daily intensity index (SDII, mm/day), (h) maximum 5-day precipitation (Rx5day, mm), (i) consecutive dry days (CDD, days/year).

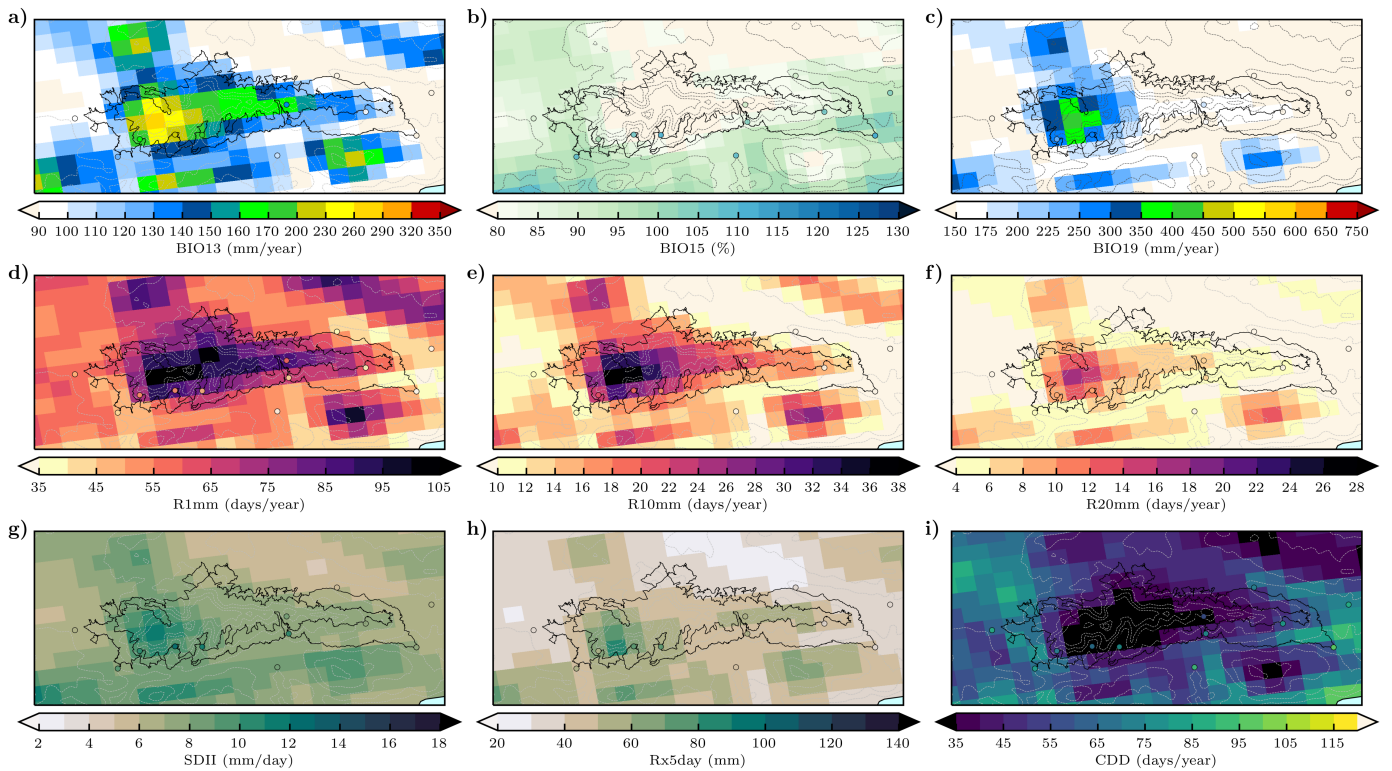

**Fig. S17** CERRA-Land precipitation bioclimatic variables and extremes: (a) precipitation of wettest month (BIO13, mm/month), (b) precipitation seasonality (BIO15, mm/month), (c) precipitation in the coldest quarter (BIO19, mm/month), (d) wet days (R1mm, days/year), (e) heavy precipitation days (R10mm, days/year), (f) very heavy precipitation days (R20mm, days/year), (g) simple daily intensity index (SDII, mm/day), (h) maximum 5-day precipitation (Rx5day, mm), (i) consecutive dry days (CDD, days/year).

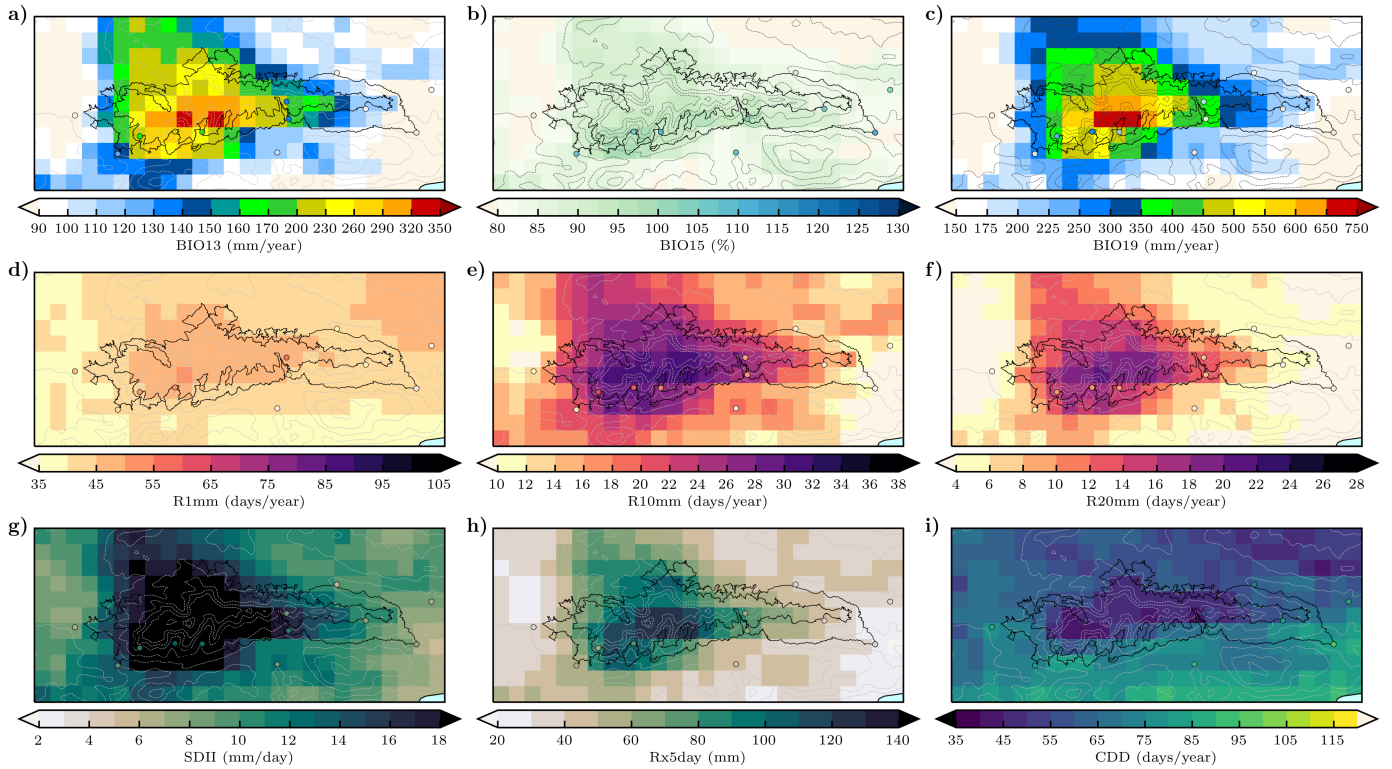

**Fig. S18** CHIRPS precipitation bioclimatic variables and extremes: (a) precipitation of wettest month (BIO13, mm/month), (b) precipitation seasonality (BIO15, mm/month), (c) precipitation in the coldest quarter (BIO19, mm/month), (d) wet days (R1mm, days/year), (e) heavy precipitation days (R10mm, days/year), (f) very heavy precipitation days (R20mm, days/year), (g) simple daily intensity index (SDII, mm/year), (h) maximum 5-day precipitation (Rx5day, mm), (i) consecutive dry days (CDD, days/year).

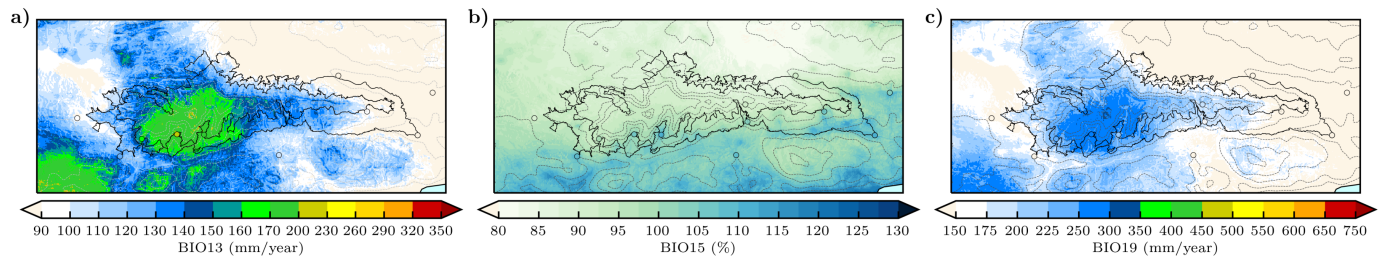

**Fig. S19** GFAT-Grid precipitation bioclimatic variables and extremes: (a) precipitation of wettest month (BIO13, mm/month), (b) precipitation seasonality (BIO15, mm/month), and (c) precipitation in the coldest quarter (BIO19, mm/month).



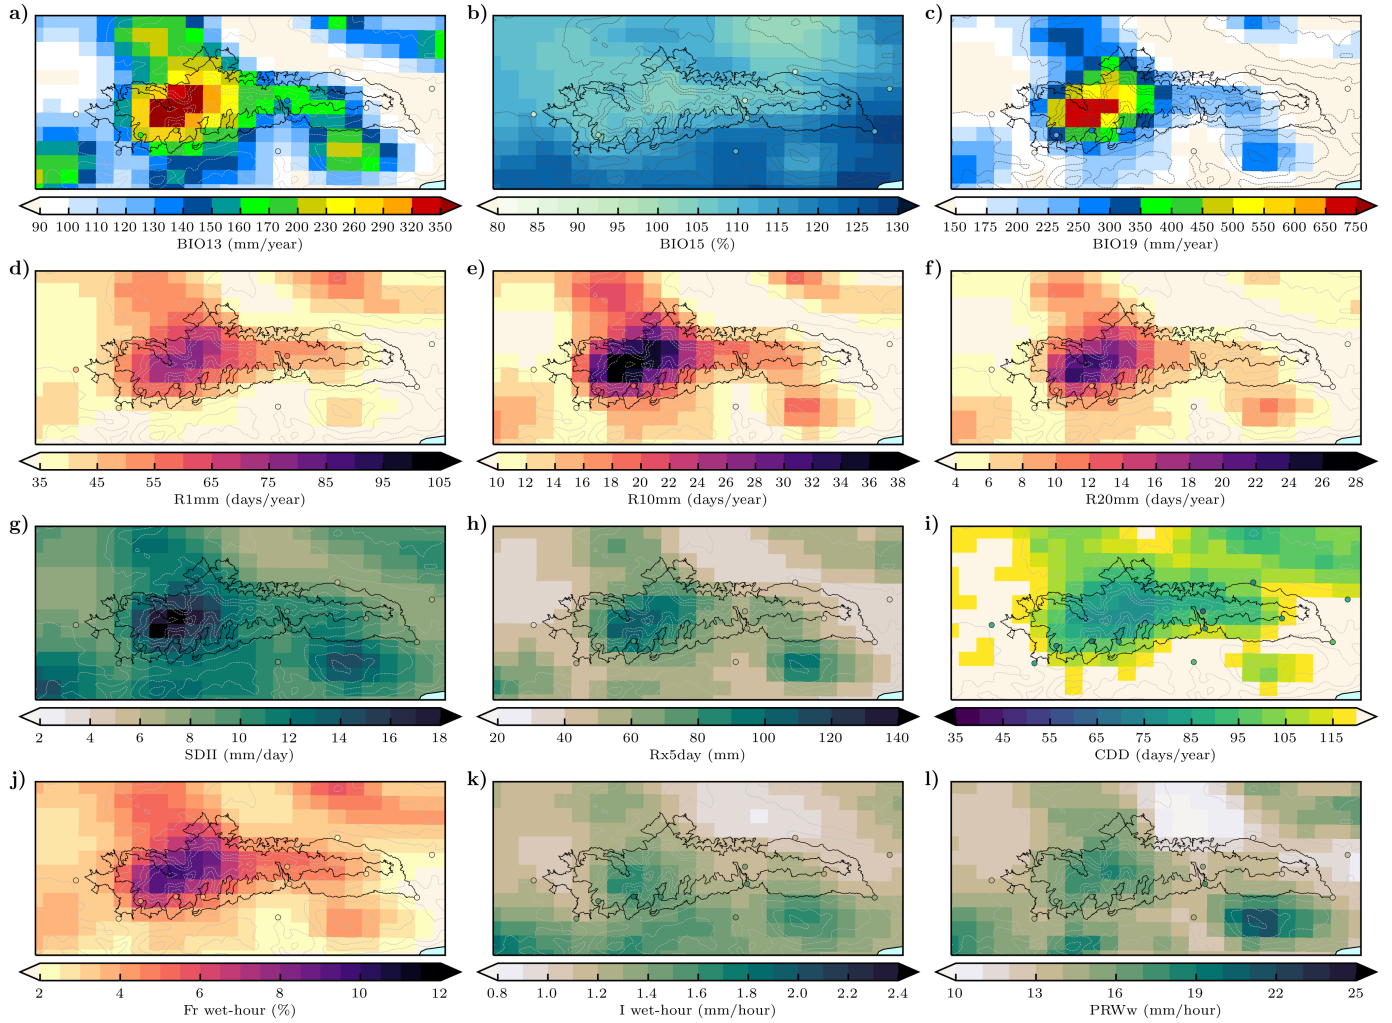

**Fig. S20** 05-WRF precipitation bioclimatic variables and extremes: (a) precipitation of wettest month (BIO13, mm/month), (b) precipitation seasonality (BIO15, mm/month), (c) precipitation in the coldest quarter (BIO19, mm/month), (d) wet days (R1mm, days/year), (e) heavy precipitation days (R10mm, days/year), (f) very heavy precipitation days (R20mm, days/year), (g) simple daily intensity index (SDII, mm/year), (h) maximum 5-day precipitation (Rx5day, mm), (i) consecutive dry days (CDD, days/year), (j) wet-hour frequency (F wet-hour, %), (k) wet-hour intensity (I wet-hour, mm/hour), and (l) maximum amount in the wettest month (PRWw, mm/hour).
